# Supplementary material for: Improved supervised classification of accelerometry data to distinguish behaviors of soaring birds
Source: PLOS journal article supplement (doi:10.1371/journal.pone.0174785), 2017-04-12
Supplement: S3 (10.1371/journal.pone.0174785.s003) [file journal.pone.0174785.s003]

**S1 Table. Amount of video collected from a trained golden eagle outfitted with an accelerometer.** Although video was collected in continuous segments at each site, the bird was only in the frame (“visible” below) for a subset of the time the camera was running. Bird was also perched on the trainer’s hand (“handling”) at times during recording sessions. See Methods for details on accelerometry and video data collection.

| <b>Location</b> | <b>Time recorded</b> | <b>Time bird not visible</b> | <b>Total time bird visible</b> | <b>Total flying/sitting time (minus handling time)</b> |
|-----------------|----------------------|------------------------------|--------------------------------|--------------------------------------------------------|
| Tehachapi cliff | 0:13:44              | 0:07:03                      | 0:06:41                        | 0:05:18                                                |
| Tehachapi ranch | 0:01:46              | 0:00:00                      | 0:01:46                        | 0:01:05                                                |
| Scrub           | 0:18:04              | 0:00:00                      | 0:18:04                        | 0:02:12                                                |
| Mojave          | 0:29:35              | 0:25:45                      | 0:03:50                        | 0:06:35                                                |
| <b>Total</b>    | <b>1:03:09</b>       |                              | <b>0:30:21</b>                 | <b>0:15:10</b>                                         |
