# Supplementary material for: Improved supervised classification of accelerometry data to distinguish behaviors of soaring birds
Source: PLOS journal article supplement (doi:10.1371/journal.pone.0174785), 2017-04-12
Supplement: S5 (10.1371/journal.pone.0174785.s005) [file journal.pone.0174785.s005]

**S3 Table. Confusion matrix of RF classification predictions.** Predictions were made on 30% (464 segments) of accelerometer data collected from a trained golden eagle and classified with a random forest model and (A) a simple ethogram (three behavioral classes: flapping, sitting and soaring) and (B) a complex ethogram (five behavior classes: flapping banking, flapping straight, sitting soaring banking and soaring straight).

(A)

|              | Flapping   | Sitting   | Soaring    | <b>Total</b> |
|--------------|------------|-----------|------------|--------------|
| Flapping     | 92         | 16        | 26         | <b>134</b>   |
| Sitting      | 10         | 39        | 1          | <b>50</b>    |
| Soaring      | 9          | 0         | 271        | <b>280</b>   |
| <b>Total</b> | <b>111</b> | <b>55</b> | <b>298</b> | <b>464</b>   |

(B)

|                   | Flapping banking | Flapping straight | Sitting   | Soaring banking | Soaring straight | <b>Total</b> |
|-------------------|------------------|-------------------|-----------|-----------------|------------------|--------------|
| Flapping banking  | 28               | 12                | 7         | 3               | 3                | <b>53</b>    |
| Flapping straight | 6                | 39                | 17        | 15              | 5                | <b>82</b>    |
| Sitting           | 1                | 1                 | 45        | 1               | 0                | <b>48</b>    |
| Soaring banking   | 1                | 6                 | 0         | 161             | 26               | <b>194</b>   |
| Soaring straight  | 1                | 1                 | 1         | 71              | 13               | <b>87</b>    |
| <b>Total</b>      | <b>37</b>        | <b>59</b>         | <b>70</b> | <b>251</b>      | <b>47</b>        | <b>464</b>   |
